1                                   **Visualization of SARS-CoV-2 infection dynamic**

2   Chengjin Ye<sup>1\*</sup>, Kevin Chiem<sup>1</sup>, Jun-Gyu Park<sup>1</sup>, Jesus A. Silvas<sup>1</sup>, Desarey  
3   Morales Vasquez<sup>1</sup>, Jordi B. Torrelles<sup>1</sup>, James J. Kobie<sup>2</sup>, Mark R. Walter<sup>3</sup>, Juan  
4   Carlos de la Torre<sup>4</sup> and Luis Martinez-Sobrido<sup>1,5\*</sup>

5  
6   <sup>1</sup> Host-Pathogen Interactions and Population Health Programs, Texas  
7   Biomedical Research Institute, San Antonio, Texas 78227, USA

8   <sup>2</sup> Department of Medicine, Division of Infectious Diseases, University of  
9   Alabama at Birmingham, Birmingham, Alabama 35294, USA

10   <sup>3</sup> Department of Microbiology, University of Alabama at Birmingham,  
11   Birmingham, Alabama 35294, USA

12   <sup>4</sup> Department of Immunology and Microbiology, The Scripps Research Institute,  
13   La Jolla, California 92037, USA

14   <sup>5</sup> Lead Contact

15   \*Correspondence: [cye@txbiomed.org](mailto:cye@txbiomed.org), [lmartinez@txbiomed.org](mailto:lmartinez@txbiomed.org)

16   Lead contact email: [lmartinez@txbiomed.org](mailto:lmartinez@txbiomed.org)

17

18

19

20

21

22

23        **SUMMARY**

24        Replication-competent recombinant viruses expressing reporter genes  
25        provide valuable tools to investigate viral infection. Low levels of reporter gene  
26        expressed from previous reporter-expressing rSARS-CoV-2 have jeopardized  
27        their use to monitor the dynamics of SARS-CoV-2 infection *in vitro* or *in vivo*.  
28        Here, we report an alternative strategy where reporter genes were placed  
29        upstream of the viral nucleocapsid gene followed by a 2A cleavage peptide.  
30        The higher levels of reporter expression using this strategy resulted in efficient  
31        visualization of rSARS-CoV-2 in infected cultured cells and K18 hACE2  
32        transgenic mice. Importantly, real-time viral infection was readily tracked using  
33        a non-invasive *in vivo* imaging system and allowed us to rapidly identify  
34        antibodies which are able to neutralize SARS-CoV-2 infection *in vivo*. Notably,  
35        these reporter-expressing rSARS-CoV-2 retained wild-type virus like  
36        pathogenicity *in vivo*, supporting their use to investigate viral infection,  
37        dissemination, pathogenesis and therapeutic interventions for the treatment of  
38        SARS-CoV-2 *in vivo*.

39

40

41

42        **KEYWORDS:** coronavirus; SARS-CoV-2; COVID-19; reporter gene; 2A  
43        cleavage site; fluorescence; Venus; Nano luciferase; replication dynamics; *in*  
44        *vivo* imaging



45        **INTRODUCTION**

46        Coronaviruses (CoVs) are enveloped, single-stranded, positive-sense RNA  
47        viruses that belong to the *Coronaviridae* family that can cause mild to severe  
48        respiratory infections in humans (Hu et al., 2020). Two CoVs have been  
49        associated with severe respiratory syndrome in the past two decades: Severe  
50        Acute Respiratory Syndrome CoV (SARS-CoV) in 2002-2003 and Middle East  
51        Respiratory Syndrome CoV (MERS-CoV) in 2012-present (De Wit et al., 2016).  
52        Severe acute respiratory syndrome coronavirus 2 (SARS-CoV-2) emerged in  
53        the Chinese city of Wuhan in December 2019 and is the causative agent of the  
54        coronavirus disease 2019 (COVID-19) pandemic (Lu et al., 2020; Wu et al.,  
55        2020). As of June 2021, SARS-CoV-2 has been reported to be responsible for  
56        over 150 million human infection cases and more than 3 million deaths around  
57        the World (<https://covid19.who.int/>).

58        Like SARS-CoV and MERS-CoV, SARS-CoV-2 mainly replicates in the  
59        upper (nasal turbinate) and lower (lungs) respiratory tract, resulting, in some  
60        cases, in fatal respiratory illness (Li et al., 2020; Xu et al., 2020). However, the  
61        intra-host dissemination and pathogenesis of SARS-CoV-2 are not well  
62        understood. Several animal models of SARS-CoV-2 infection have been  
63        established and have already provided very valuable information to  
64        understand the mechanism of tissue and cell tropism, replication and  
65        pathogenesis (Imai et al., 2020; Kim et al., 2020; Oladunni et al., 2020; Singh  
66        et al., 2021; Sun et al., 2020). However, assessing the presence of

67 SARS-CoV-2 in infected animals, organs or tissues has required collection and  
68 processing of samples upon euthanasia, which complicates studies examining  
69 the longitudinal dynamic of a viral infection within an infected host.  
70 Recombinant (r)SARS-CoV-2 expressing reporter genes could overcome this  
71 problem and allow tracking viral infection *in vivo* and in real time by monitoring  
72 the expression of the reporter gene. We and others have documented the  
73 feasibility of generating reporter-expressing rSARS-CoV-2 using reverse  
74 genetic system (Chiem et al., 2021; Xie et al., 2020a). These rSARS-CoV-2  
75 have been genetically engineered to express the reporter gene by substituting  
76 the viral open reading frame (ORF) 7a protein with the reporter gene of interest,  
77 an experimental approach first employed to generate reporter-expressing  
78 rSARS-CoV (Sims et al., 2005). Despite these reporter-expressing  
79 rSARS-CoV-2 were showing comparable plaque phenotype, replication and  
80 growth kinetics as those of wild-type virus (rSARS-CoV-2/WT) *in vitro* (Chiem  
81 et al., 2021; Xie et al., 2020a; Xie et al., 2020b), it is unclear if the  
82 reporter-expressing rSARS-CoV-2 lacking ORF7a recapitulate viral  
83 pathogenicity *in vivo* and whether reporter gene expression levels could be  
84 efficiently tracked *ex vivo* using tissues or organs from infected animals, or in a  
85 whole organism *in vivo*.

86 In this study, we cloned fluorescent (Venus) and luciferase (Nano luciferase,  
87 Nluc) reporter genes upstream of the SARS-CoV-2 nucleocapsid (N) gene  
88 separated by the porcine teschero virus (PTV-1) 2A proteolytic cleavage site to

89 generate new reporter-expressing rSARS-CoV-2 without the deletion of the  
90 ORF7a protein. *In vitro*, rSARS-CoV-2 expressing reporter genes from the viral  
91 N locus replicated and made viral plaques similar to those of rSARS-CoV-2/WT.  
92 Notably, reporter-expressing rSARS-CoV-2 generated using this 2A strategy  
93 expressed higher levels of reporter gene expression compared to those  
94 rSARS-CoV-2 generated by substituting the viral ORF7a protein with the  
95 reporter gene of interest. Importantly, rSARS-CoV-2/Venus-2A and  
96 rSARS-CoV-2/Nluc-2A showed rSARS-CoV-2/WT-like pathogenicity *in vivo*.  
97 Notably, the higher level of Venus expression from rSARS-CoV-2/Venus-2A  
98 allowed us to detect viral infection in the lungs of infected K18 human  
99 angiotensin converting enzyme 2 (hACE2) transgenic mice using an *in vivo*  
100 imaging system (IVIS). Moreover, Venus expression from  
101 rSARS-CoV-2/Venus-2A was stable up to seven passages *in vitro* in cultured  
102 Vero E6 cells and *in vivo* up to day 6 post-infection. Importantly, levels of  
103 Venus expression correlated well with viral titers detected in the lungs,  
104 demonstrating the feasibility of using Venus expression as a valid surrogate  
105 marker to evaluate SARS-CoV-2 infection. Using rSARS-CoV-2/Nluc-2A, we  
106 were able to track the dynamics of viral infection in real time and longitudinally  
107 assess SARS-CoV-2 infection *in vivo*. Finally, we testified the feasibility of  
108 using the rSARS-CoV-2/Nluc-2A to rapidly and accurately identify antibodies  
109 that neutralize viral infection *in vivo*.

110 Our data demonstrate that these next-generation of rSARS-CoV-2

111 expressing reporter genes we have generated can be used to easily monitor  
112 viral infection in cultured cells and in validated animal models of infection.  
113 Importantly, our new rSARS-CoV-2/Venus-2A or rSARS-CoV-2/Nluc-2A retain  
114 similar virulence to that of rSARS-CoV-2/WT in K18 hACE2 transgenic mice  
115 and can be used to investigate viral replication, tropism and viral dissemination  
116 and pathogenesis *in vivo* and to rapidly identify therapeutics for the treatment  
117 of SARS-CoV-2 infection and associated COVID-19 disease.

118

119

120

121

122

123

124

125

126

127

128

129

130

131

132

133       **RESULTS**

134       **Generation of rSARS-CoV-2 expressing Venus**

135       We have recently described the generation and characterization of  
136 rSARS-CoV-2 where a reporter gene of interest replaced the viral ORF7a  
137 protein (Chiem et al., 2021). However, these rSARS-CoV-2 showed low levels  
138 of reporter gene expression during viral infection. To increase expression  
139 levels of reporter gene during SARS-CoV-2 infection and avoid the deletion of  
140 ORF7a protein, we implemented a strategy we previously used to generate  
141 recombinant influenza viruses and mammarenaviruses (Nogales et al., 2019;  
142 Ye et al., 2020b). In this approach, the sequences of the reporter Venus  
143 fluorescent protein and the porcine teschovirus 1 (PTV-1) 2A self-cleaving  
144 peptide (Cai et al., 2018) were cloned upstream of the SARS-CoV-2 N gene  
145 (**Fig. 1A**), and the sequences harboring the fusion Venus-2A-N were cloned  
146 into the previously described bacterial artificial chromosome (BAC) containing  
147 the entire SARS-CoV-2 genome (Chiem et al., 2020; Ye et al., 2020a). We  
148 rescued rSARS-CoV-2/Venus-2A virus according to our previously described  
149 protocol (Chiem et al., 2020; Ye et al., 2020a). Vero E6 cells infected with the  
150 tissue culture supernatant from Vero E6 cells transfected with the BAC  
151 containing the viral genome of rSARS-CoV-2/Venus-2A resulted in the  
152 expression of Venus in the same cells expressing the viral N protein (**Fig. 1B**).  
153 Venus was readily detected in whole cell lysate from rSARS-CoV-2/Venus-2A-,  
154 but not rSARS-CoV-2/WT-infected Vero E6 cells, while the viral N protein was

155 detected in lysate obtained from both rSARS-CoV-2/Venus-2A- and  
156 rSARS-CoV-2/WT-infected Vero E6 cells (**Fig. 1C**). We confirmed the genetic  
157 identity of rSARS-CoV-2/Venus-2A using reverse-transcription polymerase  
158 chain reaction (RT-PCR) to amplify the Venus sequence and the entire  
159 sequence between ORF8 and N. The Venus fragment was amplified from cells  
160 infected with rSARS-CoV-2/Venus-2A, while the fragment between ORF8 and  
161 N was detected in cells infected with either rSARS-CoV-2/WT or  
162 rSARS-CoV-2/Venus-2A. As predicted, the amplified fragment from  
163 rSARS-CoV-2/Venus-2A infected cells had a higher molecular size than the  
164 one obtained from rSARS-CoV-2/WT-infected cells (**Fig. 1D**).

#### 165 ***In vitro* characterization of rSARS-CoV-2/Venus-2A**

166 We next assessed the fitness of rSARS-CoV-2/Venus-2A in Vero E6 cells  
167 by evaluating its growth kinetics, plaque phenotype, and reporter expression  
168 and compared them to our previously described rSARS-CoV-2/ $\Delta$ 7a-Venus and  
169 rSARS-CoV-2/WT. rSARS-CoV-2/Venus-2A showed similar growth kinetics to  
170 those of rSARS-CoV-2/WT or rSARS-CoV-2/ $\Delta$ 7a-Venus (**Fig. 2A**). Likewise,  
171 rSARS-CoV-2/Venus-2A, rSARS-CoV-2/WT and rSARS-CoV-2/ $\Delta$ 7a-Venus  
172 exhibited similar plaque phenotypes (**Fig. 2B**). Notably, plaques formed by  
173 rSARS-CoV-2/Venus-2A, but not those of rSARS-CoV-2/ $\Delta$ 7a-Venus, could be  
174 readily detected using a fluorescent imaging system, most likely because of  
175 the higher levels of Venus expressed from the locus of the viral N than those  
176 from the locus of the viral ORF7a (**Fig. 2B**). We next examined Venus

177 expression in Vero E6 cells infected (MOI 0.001) with either  
178 rSARS-CoV-2/Venus-2A or rSARS-CoV-2/ $\Delta$ 7a-Venus. Both infections showed  
179 peak Venus expression at 48 h post-infection (hpi), but Venus expression  
180 levels from rSARS-CoV-2/Venus-2A infected Vero E6 cells were higher than  
181 those infected with rSARS-CoV-2/ $\Delta$ 7a-Venus (**Fig. 2C**). To confirm this, we  
182 prepared whole cell lysates from Mock, rSARS-CoV-2/Venus-2A and  
183 rSARS-CoV-2/ $\Delta$ 7a-Venus infected Vero E6 cells and analyzed them by  
184 Western blot. Venus expression levels in rSARS-CoV-2/Venus-2A infected  
185 Vero E6 cells were greater than those of rSARS-CoV-2/ $\Delta$ 7a-Venus infected  
186 cells at all time points, whereas expression levels of N protein were  
187 comparable at all time points in Vero E6 cells infected with  
188 rSARS-CoV-2/Venus-2A and rSARS-CoV-2/ $\Delta$ 7a-Venus (**Fig. 2D**).

### 189 ***In vivo* characterization of rSARS-CoV-2/Venus-2A**

190 K18 transgenic mice expressing hACE2 have been shown to be a good  
191 animal model of SARS-CoV-2 infection (Oladunni et al., 2020; Zheng et al.,  
192 2021). We therefore examined whether SARS-CoV-2 infection could be  
193 tracked *ex vivo* using Venus expression. To that end, K18 hACE2 transgenic  
194 mice were infected intranasally with  $10^5$  PFU of rSARS-CoV-2/Venus-2A,  
195 rSARS-CoV-2/ $\Delta$ 7a-Venus or rSARS-CoV-2/WT (**Fig. 3**). Mice were euthanized  
196 at 1, 2, 4 and 6 days post-infection (dpi), and their lungs were excised and  
197 imaged *ex vivo* using an *in vivo* imaging system (AMI spectrum). Venus  
198 expression was readily detected in all lungs obtained from mice infected with

199 rSARS-CoV-2/Venus-2A but not those infected with rSARS-CoV-2/ $\Delta$ 7a-Venus,  
200 or rSARS-CoV-2/WT (**Fig. 3A**). Quantitative analyses showed that Venus  
201 intensity peaks at 2 dpi and decreases over the course of infection in the lungs  
202 of infected mice (**Fig. 3B**). Nevertheless, gross lesions on the lung surface of  
203 mice infected with rSARS-CoV-2/Venus-2A was comparable to those observed  
204 in rSARS-CoV-2/WT or rSARS-CoV-2/ $\Delta$ 7a-Venus infected mice (**Fig. 3C** and  
205 **3D**). In addition, infection with rSARS-CoV-2/Venus-2A and  
206 rSARS-CoV-2/ $\Delta$ 7a-Venus resulted in comparable viral titers to those observed  
207 in K18 hACE2 transgenic mice infected with rSARS-CoV-2/WT in all organs at  
208 all times pi (**Fig. 3E**), suggesting that the undetectable Venus expression in the  
209 lungs of K18 hACE2 mice infected with rSARS-CoV-2/ $\Delta$ 7a-Venus is unlikely  
210 due to lower levels of viral replication *in vivo*. Notably, we observed a  
211 correlation between virus replication and fluorescence intensity in the lungs  
212 (**Fig. 3F**).

213 To investigate the pathogenicity of rSARS-CoV-2/Venus-2A, we infected  
214 ( $10^5$  PFU) K18 hACE2 transgenic mice intranasally with  
215 rSARS-CoV-2/Venus-2A, rSARS-CoV-2/ $\Delta$ 7a-Venus or rSARS-CoV-2/WT, and  
216 monitored changes in body weight and survival rate for 12 days after viral  
217 infection. All infected mice showed significant bodyweight loss starting from 4  
218 dpi. Mice infected with rSARS-CoV-2/ $\Delta$ 7a-Venus succumbed to viral infection  
219 by 8 dpi and mice infected with rSARS-CoV-2/Venus-2A or rSARS-CoV-2/WT  
220 succumbed to infection by 9 dpi (**Fig. 3G** and **3H**).



221 ***In vitro* and *in vivo* stability of rSARS-CoV-2/Venus-2A**

222 Because reporter-expressing rSARS-CoV-2 applications necessitate  
223 genetic and phenotypic stability, we evaluated the stability of  
224 rSARS-CoV-2/Venus-2A *in vitro* and *in vivo*. To that end, we passaged the  
225 rSARS-CoV-2/Venus-2A seven times in Vero E6 cells and tissue culture  
226 supernatant (TCS) from selected passages were subjected to the analysis of  
227 plaque assay using a fluorescent imaging system and immunostaining with the  
228 1C7C7 N protein monoclonal antibody (MAb) (**Fig. 4A**, left). Viruses present in  
229 TCS from P1, P3, P5 and P7 retained 100% Venus expression (**Fig. 4A**, right).  
230 For the *in vivo* stability evaluation of rSARS-CoV-2/Venus-2A, lung  
231 homogenates from K18 hACE2 transgenic mice at 1, 2, 4 and 6 dpi infected  
232 with rSARS-CoV-2/Venus-2A were subjected to plaque assay using a  
233 fluorescent imaging system and immunostaining with the 1C7C7 N protein  
234 MAb (**Fig. 4B**, left). Lung homogenates from 1 and 2 dpi retained 100% Venus  
235 expression, and homogenates from 4 and 6 dpi retained 99% and 98%,  
236 respectively, Venus expression (**Fig. 4B**, right).

237 **Visualization of SARS-CoV-2 replication dynamic *in vivo***

238 While fluorescent Venus expression allowed us to conduct *ex vivo* imaging  
239 of lungs from SARS-CoV-2 infected mice, it did not allow us to track viral  
240 infection in the entire mouse using IVIS. To circumvent this problem, we  
241 engineered a Nluc-expressing rSARS-CoV-2 using our reverse genetic system  
242 and the same 2A strategy (**Fig. 5A**). This rSARS-CoV-2/Nluc-2A exhibited a

243 similar plaque phenotype and comparable growth kinetics in Vero E6 cells as  
244 the rSARS-CoV-2/WT and our previously described rSARS-CoV-2/ $\Delta$ 7a-Nluc  
245 (**Fig. 5B** and **5C**). Notably, Nluc expression levels were increased by more  
246 than 30-folds in Vero E6 cells infected with rSARS-CoV-2/Nluc-2A than  
247 rSARS-CoV-2/ $\Delta$ 7a-Nluc at 72 hpi (**Fig. 5D**).

248 Since the rSARS-CoV-2/Nluc-2A expressed significantly higher levels of  
249 Nluc than those of our previously described rSARS-CoV-2/ $\Delta$ 7a-Nluc *in vitro*,  
250 we evaluated whether SARS-CoV-2 infection could be tracked *in vivo* using  
251 Nluc expression directed by rSARS-CoV-2/Nluc-2A. To that end, we infected  
252 ( $10^5$  PFU) K18 hACE2 transgenic mice intranasally with rSARS-CoV-2/Nluc-2A  
253 or rSARS-CoV-2/WT (**Fig. 6**). Mice were anesthetized, retro-orbitally injected  
254 with Nluc substrate and then imaged under an IVIS at 1, 2, 4 and 6 dpi. Nluc  
255 expression was readily detected in mice infected with rSARS-CoV-2/Nluc-2A  
256 but not those infected with rSARS-CoV-2/WT (**Fig. 6A**), as previously shown *in*  
257 *vitro* (**Fig. 5D**). Quantitative analyses showed that Nluc intensity continued  
258 increasing at later dpi (**Fig. 6B**). Gross lesions on the lung surface of mice  
259 infected with rSARS-CoV-2/Nluc-2A was comparable to those in the WT  
260 rSARS-CoV-2 infected mice (**Fig. 6C** and **6D**). Importantly, viral titers detected  
261 in the rSARS-CoV-2/Nluc-2A infected mice were comparable to those infected  
262 with rSARS-CoV-2/WT in all organs tested at different dpi (**Fig. 6E**), despite  
263 the Nluc activity was only detected in the organs from rSARS-CoV-2/Nluc-2A  
264 virus infected mice (**Fig. 6F**). Unexpectedly, the Nluc intensity did not correlate

265 with the viral titers in the lungs at 4 and 6 dpi (**Fig. 6G**), indicating the Nluc  
266 accumulates *in vivo*. Meanwhile, we also compared the pathogenicity of  
267 rSARS-CoV-2/Nluc-2A and rSARS-CoV-2/WT in K18 hACE2 transgenic mice.  
268 Both rSARS-CoV-2/Nluc-2A and rSARS-CoV-2/WT showed similar virulence  
269 (**Figs. 6H and 6I**).

#### 270 **Effect of NABs on progression of Nluc-2A virus infection *in vivo***

271 Although several vaccines against COVID-19 have been already approved  
272 for emergency use by United States (US) Food and Drug Administration (FDA),  
273 identification and characterization of SARS-CoV-2 NABs represent a valuable  
274 therapeutic option to counteract the putative emergence of variants of concern  
275 (VoC). Currently, most NAB screenings are performed in tissue cultured cells  
276 rather than *in vivo*, which is heavily reliant upon viral titration of animal organs,  
277 a process that is time and labor intensive. We therefore investigated whether  
278 the use of rSARS-CoV-2/Nluc-2A could expedite the screening process and  
279 facilitate the investigation of how NAB affects the kinetics of virus infection. To  
280 that end, we treated K18 hACE2 transgenic prophylactically with 1212C2, a  
281 previously described SARS-CoV-2 NAB (Piepenbrink et al., 2021), for 12 h,  
282 and then infected them ( $10^5$  PFU) with rSARS-CoV-2/Nluc-2A. Non-invasive  
283 longitudinal imaging of the mice revealed that 1212C2 treated mice  
284 dramatically restricted rSARS-CoV-2/Nluc-2A multiplication since no significant  
285 Nluc signal was detected at any time point examined (**Figs. 7A and 7B**). These  
286 results were also supported by the observation of reduced lung surface lesions

287 **(Figs. 7C and 7D)**, Nluc expression **(Fig. 7E)** and virus titers **(Fig. 7F)** in the  
288 nasal turbinate, lungs, and brains of 1212C2-treated mice. Moreover, 1212C2  
289 was able to protect mice from clinical symptoms of rSARS-CoV-2/Nluc-2A  
290 infection as determined by changes in body weight **(Fig. 7G)** and survival rate  
291 **(Fig. 7H)**.

292

293

294

295

296

297

298

299

300

301

302

303

304

305

306

307

308

309       **DISCUSSION**

310       In this study, we report a novel strategy to generate replication competent  
311 reporter-expressing (e.g., Venus or Nluc) rSARS-CoV-2 using the  
312 well-documented BAC-based reverse genetic system (Ye et al., 2020a). Our  
313 rSARS-CoV-2/Venus-2A and rSARS-CoV-2/Nluc-2A both exhibited  
314 rSARS-CoV-2/WT-like growth properties *in vitro* and *in vivo* without displaying  
315 attenuation and allowed us to monitor virus infection *ex vivo* in the lungs of  
316 infected mice (rSARS-CoV-2/Venus-2A) and the dynamics of viral replication in  
317 the entire mouse (rSARS-CoV-2/Nluc-2A) using non-invasive longitudinal *in*  
318 *vivo* imaging. Importantly, we demonstrate the feasibility of using  
319 rSARS-CoV-2/Nluc-2A to rapidly identify prophylactics and/or therapeutics *in*  
320 *vivo*.

321       We and others have previously demonstrated the feasibility of using this 2A  
322 approach to generate recombinant viruses expressing reporter genes fused to  
323 a viral protein (Cai et al., 2018; Manicassamy et al., 2010; Nogales et al., 2019;  
324 Ye et al., 2020b). To generate these novel reporter rSARS-CoV-2 expressing  
325 higher level of reporter gene, we placed the PTV-1 2A self-cleaving peptide  
326 between the reporter gene and the viral N gene (**Fig. 1**). This results in the  
327 expression of a polyprotein that is post-translationally cleaved at the 2A site  
328 leading to the individual expression of the reporter gene and the viral N protein  
329 (Luke et al., 2010), and the expression of Venus in rSARS-CoV-2/Venus-2A  
330 was extremely increased *in vitro* and *in vivo* (**Figs. 2** and **3**, respectively). The

331 rationale of cloning the reporter gene fused to the viral N gene to increase  
332 reporter gene expression was based on the N protein being one of the most  
333 abundant structural proteins produced during SARS-CoV-2 and other CoVs  
334 infections (Hiscox et al., 1995; Hou et al., 2020; Scobey et al., 2013).  
335 Importantly, this new 2A approach does not remove any viral gene from the  
336 viral genome. Although recent data from our laboratory (Silvas et al., 2021)  
337 suggest that ORF7a is not essential for SARS-CoV-2 replication *in vitro* and *in*  
338 *vivo*, it is still largely unknown whether the lack of ORF7a affects some  
339 unknown aspects of SARS-CoV-2 infections. In addition, this also increases  
340 the instability concern of reporter gene, as shown in a recent study where a  
341 reporter gene fused into the C-terminus of ORF7a was not stable (Rihn et al.,  
342 2021). Contrarily, our rSARS-CoV-2/Venus-2A exhibited 100% stability after  
343 seven passages in cultured cells and retained 98% stability *in vivo* at 6 dpi (**Fig.**  
344 **4**).

345 The increased expression level of reporter gene also facilitates the use of  
346 bioluminescence imaging of the entire infected mouse. rSARS-CoV-2/Nluc-2A  
347 expressed ~30 folds higher levels of Nluc than rSARS-CoV-2/ $\Delta$ 7a-Nluc in  
348 cultured cells (**Fig. 5**), which allowed us to track the viral infection as early as 1  
349 dpi (**Fig. 6A**). Another advantage is that the rSARS-CoV-2/Nluc-2A could  
350 provide a real-time and longitudinal information in a non-invasive manner of  
351 infection rather than providing a static “snapshot” using the traditional  
352 necropsy and titration of tissues or organs from infected animal. Notably, Nluc

353 activity correlated well with the titers detected in the lungs at 1 and 2 dpi (**Figs.**  
354 **6E** and **6F**). However, viral titers in lungs were decreased at 4 and 6 dpi,  
355 whereas we still detected high levels of Nluc activity. This may reflect Nluc  
356 stability (Hall et al., 2012), which may lead to the accumulation and gradual  
357 increase of Nluc signal during the course of viral infection. This explanation  
358 was also supported by the *in vitro* infection data in which the viral titers were  
359 declining yet and the Nluc activity was gradually increasing (**Fig. 5D**).

360 NAb represent a promising prophylactic and/or therapeutic treatment  
361 against SARS-CoV-2, particularly for individuals infected with newly identified  
362 VoC. However, evaluation of SARS-CoV-2 NAb *in vivo* relies on the necropsy  
363 and viral titration of tissues and/or organs from infected animals. To overcome  
364 this limitation, we established a rapid method based on a non-invasive  
365 measurement of Nluc expression. By using this *in vivo* imaging system, NAb  
366 could be easily identified as early as 1 dpi and in a relative high throughput  
367 method. This was further supported by Nluc activity, viral titration, body weight  
368 changes and survival rate (**Fig. 7**), indicating our strategy provides a rapid *in*  
369 *vivo* screening method to identify NAb against SARS-CoV-2.

370 In the present work, we have documented a new strategy to generate  
371 replication-competent reporter rSARS-CoV-2 expressing higher levels of  
372 reporter gene than those previously described by substituting the viral ORF7a  
373 protein with the report gene. This novel strategy does not eliminate any viral  
374 gene and these new reporter-expressing rSARS-CoV-2 were genetically stable

375 and replicated as efficiently as rSARS-CoV-2/WT both *in vitro* and *in vivo*, with  
376 comparable pathogenicity in K18 hACE2 transgenic mice. Notably, the robust  
377 levels of reporter gene expression of these new reporter-expressing  
378 rSARS-CoV-2 represent an excellent option to study viral pathogenesis, tissue  
379 tropism, and replication kinetics of SARS-CoV-2, including recently identified  
380 VoC.

381

382

383

384

385

386

387

388

389

390

391

392

393

394

395

396



397

## 398 **MATERIAL AND METHODS**

### 399 **Biosafety**

400 All the *in vitro* and *in vivo* experiments with infectious rSARS-CoV-2 were  
401 conducted under appropriate biosafety level (BSL) 3 and animal BSL3 (ABSL3)  
402 laboratories, respectively, at Texas Biomedical Research Institute (Texas  
403 Biomed). Experiments were approved by the Texas Biomed Institutional  
404 Biosafety (IBC) and Animal Care and Use (IACUC) committees.

### 405 **Cells and viruses**

406 African green monkey kidney epithelial cells (Vero E6, CRL-1586) were  
407 obtained from the American Type Culture Collection (ATCC, Bethesda, MD)  
408 and maintained in Dulbecco's modified Eagle medium (DMEM) supplemented  
409 with 5% (v/v) fetal bovine serum (FBS, VWR) and 1%  
410 penicillin-streptomycin-glutamine (PSG) solution (Corning).

411 Recombinant (r)SARS-CoV-2 were generated based on the backbone of  
412 the USA-WA1/2020 strain using a previously described bacterial artificial  
413 chromosome (BAC)-based reverse genetics system (Chiem et al., 2020; Ye et  
414 al., 2020a).

### 415 **Rescue of rSARS-CoV-2**

416 Virus rescue experiments were performed as previously described  
417 (Avila-Perez et al., 2019). Briefly, confluent monolayers of Vero E6 cells (10<sup>6</sup>  
418 cells/well, 6-well plates, triplicates) were transfected with 4.0 µg/well of

419 SARS-CoV-2 BAC using Lipofectamine 2000. After 24 h, transfection media  
420 was exchanged for post-infection media (DMEM supplemented with 2% FBS  
421 and 1% PSG), and cells were split and seeded into T75 flasks 72 h  
422 post-transfection. After incubation for another 72 h, tissue culture supernatants  
423 were collected, labeled as P0 and stored at -80°C. After being titrated, the P0  
424 virus was used to infect fresh Vero E6 cells at MOI 0.0001 for 72 h to generate  
425 P1 stocks. P1 viral stocks were aliquoted and stored at -80°C until being used.

#### 426 **Western blot**

427 Whole cell lysates, SDS-PAGE, and Western blotting were performed as  
428 previously described (Ye et al., 2020b). Briefly, cells were lysed in passive lysis  
429 buffer (Promega, MI, USA) at 4°C for 30 min, followed by centrifugation at  
430 12,000 g at 4°C for another 30 min. Equivalent amounts of cell lysates were  
431 subjected to 12% SDS-PAGE and transferred to nitrocellulose membranes.  
432 After blocking with 5% bovine serum albumin in PBS containing 0.1% Tween  
433 20 at room temperature for 1 h, the membranes were incubated with the  
434 indicated primary antibodies at 4°C overnight, followed by horseradish  
435 peroxidase-conjugated secondary antibody incubation at 37°C for 1 h.  $\beta$ -Actin  
436 was used as the loading control. Membranes were developed with ECL  
437 detection reagent (Thermo Fisher Scientific) in the ChemiDoc MP Imaging  
438 System (Bio-Rad, Hercules, CA, USA).

#### 439 **Immunofluorescence assay (IFA)**

440 Vero E6 cells ( $10^6$  cells/well, 6-well plate format, triplicates) were

441 mock-inoculated or inoculated with the tissue culture supernatant (1 ml/well) of  
442 Vero E6 cells transfected with the BACs collected at 72 h post-transfection. At  
443 48 h post-inoculation, cells were fixed with 10% formaldehyde solution at 4°C  
444 overnight and permeabilized using 0.5% (v/v) Triton X-100 in PBS for 15 min at  
445 room temperature. Then, cells were incubated overnight with 1 µg/ml of a  
446 SARS-CoV cross-reactive N MAb (1C7C7) at 4°C, washed stringently with  
447 PBS, and stained with a FITC-labeled goat anti-mouse IgG (1:200). Finally,  
448 cells were visualized and imaged under a EVOS fluorescent microscope  
449 (Thermo Fisher Scientific).

#### 450 **RT-PCR**

451 Total RNA from virus infected (MOI=0.01) Vero E6 cells ( $10^6$  cells/well,  
452 6-well plate format) was extracted with TRIzol Reagent (Thermo Fisher  
453 Scientific) according to the manufacturer's instructions. RT-PCR amplification  
454 of the viral genome spanning nucleotides 27,895-29,534 (according to the  
455 SARS-CoV-2 USA-WA1/2020 viral genome) was performed using Super Script  
456 II Reverse transcriptase (Thermo Fisher Scientific) and Expanded High Fidelity  
457 PCR System (Sigma Aldrich). The amplified DNA products were separated on  
458 a 0.7% agarose gel. All primer sequences used for RT-PCR are available upon  
459 request.

#### 460 **Plaque assay and immunostaining**

461 Confluent monolayers of Vero E6 cells ( $10^6$  cells/well, 6-well plate format,  
462 triplicates) were infected with serial viral dilutions for 1 h at 37°C. After viral

463 adsorption, cells were overlaid with pi media containing 1% low melting agar  
464 and incubated at 37°C. At 72 hpi, cells were fixed overnight with 10%  
465 formaldehyde solution. For visualization of Venus, plates were photographed  
466 under a ChemiDoc MP Imaging System. For immunostaining, cells were  
467 permeabilized with 0.5% (v/v) Triton X-100 in PBS for 15 min at room  
468 temperature and immunostained using the SARS-CoV cross-reactive N  
469 protein 1C7C7 MAb (1 µg/ml) and the Vectastain ABC kit (Vector Laboratories),  
470 following the manufacturers' instruction. After immunostaining, plates were  
471 scanned and photographed using a ChemiDoc MP Imaging System.

#### 472 **Virus growth kinetics**

473 Confluent monolayers of Vero E6 cells (6-well format, 10<sup>6</sup> cells/well,  
474 triplicates) were mock infected or infected (MOI=0.01) with rSARS-CoV-2/WT,  
475 rSARS-CoV-2/Δ7a-Venus, rSARS-CoV-2/Venus-2A or rSARS-CoV-2/Nluc-2A.  
476 After 1 h of virus adsorption at 37°C, cells were washed with chilled PBS and  
477 overlaid with 3 ml of pi medium and incubated at 37°C. At the indicated times  
478 pi (12, 24, 48 and 72 h), viral titers in the tissue culture supernatants were  
479 determined by plaque assay (Nogales et al., 2014). Presence of Nluc in the  
480 tissue culture supernatants from mock and rSARS-CoV-2/WT,  
481 rSARS-CoV-2/Δ7a-Nluc or rSARS-CoV-2/Nluc-2A infected cells was quantified  
482 using Nano-Glo® Luciferase Assay System (Promega) following the  
483 manufacturers' specification.

#### 484 **Animal experiments**

485 All animal protocols were approved by Texas Biomed IACUC (1718MU).  
486 Five-week-old female K18 hACE2 transgenic mice were purchased from The  
487 Jackson Laboratory and maintained in the animal facility at Texas Biomed  
488 under specific pathogen-free conditions. For virus infection, mice were  
489 anesthetized following gaseous sedation in an isoflurane chamber and  
490 inoculated intranasally with a dose of  $10^5$  PFU/mouse.

491 For *ex vivo* imaging of lungs, mice were humanely euthanized at 1, 2, 4  
492 and 6 dpi to collect lungs. Fluorescent images of lungs were photographed  
493 using an *in vivo* imaging system (AMI HTX) and the bright field images of lungs  
494 were taken using an iPhone 6s (Apple, CA, USA). Nasal turbinate, lungs and  
495 brains from mock or infected animals were homogenized in 1 ml of PBS for 20  
496 s at 7,000 rpm using a Precellys tissue homogenizer (Bertin Instruments,  
497 Yvelines, France). Tissue homogenates were centrifuged at 12,000 g (4 °C) for  
498 5 min, and supernatants were collected and titrated by plaque assay and  
499 immunostaining as previously described.

500 For *in vivo* bioluminescence imaging, mice were anesthetized with  
501 isoflurane, injected retro-orbitally with 100  $\mu$ l of Nano-Glo luciferase substrate  
502 (Promega), and immediately imaged. The bioluminescence data acquisition  
503 and analysis were performed using the Aura program (AMI spectrum). Flux  
504 measurements were acquired from the region of interest. The scale used is  
505 included in each figure. Immediately after imaging, nasal turbinate, lungs, and  
506 brains were collected and homogenized in 1 ml of PBS. Supernatants were

507 collected and presence of virus was determined by plaque assay and  
508 immunostaining, as described above. Nluc activity in the tissue culture  
509 supernatants was determined under a multiplate reader (BioTek Instruments,  
510 Inc) as above.

511 For the body weight and survival studies, five-week-old female K18  
512 hACE2 transgenic mice were infected intranasally with  $10^5$  PFU/animal  
513 following gaseous sedation in an isoflurane chamber. After infection, mice  
514 were monitored daily for morbidity (body weight) and mortality (survival rate)  
515 for 12 days. Mice showing a loss of more than 25% of their initial body weight  
516 were defined as reaching the experimental end-point and humanely  
517 euthanized, and the survival curves were plotted according to the method of  
518 Kaplan-Meier (Efron, 1988).

### 519 **Statistical analysis**

520 All data is presented as mean  $\pm$  standard deviation (SD) for each group  
521 and analyzed by SPSS13.0 (IBM, Armonk, NY, USA). A *P* value of less than  
522 0.05 ( $P < 0.05$ ) was considered statistically significant.

523

524

525

526

527

### 528 **ACKNOWLEDGEMENTS**

529 We are grateful to Dr. Thomas Moran at The Icahn School of Medicine at  
530 Mount Sinai for providing the SARS-CoV cross-reactive 1C7C7 N protein MAb.

531

## 532 **AUTHOR CONTRIBUTIONS**

533 C.Y rescued the recombinant viruses and conducted the *in vitro*  
534 characterization; C.Y, K.C, J.P, J.A.S and D.M.V conducted the *in vivo*  
535 experiments; J.B.T, J.J.K and M.R.W provided critical reagents; J.C.T deep  
536 sequenced the viruses; C.Y drafted the manuscript; J.B.T, J.J.K, M.R.W and  
537 J.C.T revised the manuscript; L.M.S conceived the study, provided funding,  
538 revised and finalized the manuscript.

539

540

541

542

543

544

545

546

547

548

## 549 **FIGURE LEGENDS**

550 **Figure 1. Generation of a rSARS-CoV-2 expressing Venus-2A.**

551 (A) Schematic representation of the BAC for generation of  
552 rSARS-CoV-2/Venus-2A. The sequence encoding the fusion construct  
553 Venus-2A was inserted in the viral genome of SARS-CoV-2 in the BAC. The  
554 white box represents the intergenic region between ORF8 and N. The green  
555 box represents Venus. PTV-1 2A is indicated in light blue.

556 (B) Vero E6 cells were mock-infected or infected with rBAC-SARS-CoV-2/WT  
557 or rSARS-CoV-2/Venus-2A for 48 h, fixed and immunostained with a MAb  
558 against the viral N protein (1C7C7). Cell nuclei were stained with DAPI.  
559 Representative images are shown. Scale bars, 100  $\mu$ m.

560 (C) Whole cell lysates from Vero E6 cells mock-infected or infected with  
561 rSARS-CoV-2 WT or Venus-2A for 48 h were subjected to Western blot  
562 analysis using antibodies against Venus and the viral N protein (1C7C7).  
563  $\beta$ -actin was used as a loading control.

564 (D) Total cellular RNA from Vero E6 cells mock-infected or infected with WT or  
565 Venus-2A rSARS-CoV-2 was isolated at 48 hpi. RT-PCR was used to amplify  
566 Venus (top) or the region between the ORF8 and N proteins (bottom), and the  
567 products were separated on a 0.7% agarose gel.

568 **Figure 2. Characterization of rSARS-CoV-2/Venus-2A *in vitro*.**

569 (A) Tissue culture supernatants from cells infected (MOI 0.01) with  
570 rSARS-CoV-2/WT, rSARS-CoV-2/ $\Delta$ 7a-Venus or rSARS-CoV-2/Venus-2A, were  
571 collected at the indicated times pi, and viral titers were determined by plaque  
572 assay. LOD, limitation of detection; ns, not significant.



573 **(B)** Vero E6 cells infected with ~15 PFU of rSARS-CoV-2/WT (left),  
574 rSARS-CoV-2/ $\Delta$ 7a-Venus (middle) or rSARS-CoV-2/Venus-2A (right) were  
575 fixed and fluorescent plaques were photographed under a ChemiDoc MP  
576 imaging system (top). After imaging, viral plaques were immunostained with  
577 the 1C7C7 N protein MAb (bottom).

578 **(C-D)** Vero E6 cells infected (MOI 0.001) with rSARS-CoV-2/ $\Delta$ 7a-Venus (top)  
579 or rSARS-CoV-2/Venus-2A (bottom) were monitored at the indicated times pi  
580 using fluorescent microscopy **(C)**. Cell nuclei were stained with DAPI. Scale  
581 bars, 100  $\mu$ m. At the same times pi, whole cell lysate were prepared and  
582 analyzed by Western blot analysis using antibodies against Venus and  
583 SARS-CoV-2 N protein (1C7C7).  $\beta$ -Actin was used as a loading control **(D)**.

584 **Figure 3. Replication dynamics of rSARS-CoV-2/Venus-2A *in vivo*.**

585 **(A-B)** Five-week-old K18 hACE2 transgenic mice were mock-infected or  
586 infected ( $10^5$  PFU/mouse) with rSARS-CoV-2/WT (WT),  
587 rSARS-CoV-2/ $\Delta$ 7a-Venus ( $\Delta$ 7a-Venus) or rSARS-CoV-2/Venus-2A (Venus-2A).  
588 Lungs were excised at 1, 2, 4 and 6 dpi, and Venus expression was assessed  
589 under an IVIS **(A)**. Fluorescence intensity was quantitatively analyzed by the  
590 program of Aura **(B)**.

591 **(C-D)** Images of lungs were photographed at 1, 2, 4 and 6 dpi **(C)** and the  
592 gross lesions on the lung surfaces were quantitatively analyzed by ImageJ **(D)**.  
593 ns, not significant.

594 **(E)** Viral titers in the nasal turbinate (left), lungs (middle) and brain (right) were

595 determined by plaque assay. ns, not significant.

596 **(F)** Correlation between viral titers and Venus intensity in the lungs of

597 rSARS-CoV-2/Venus-2A infected mice.

598 **(G-H)** Five-week-old K18 hACE2 transgenic mice were mock-infected or

599 intranasally inoculated with  $10^5$  PFU/mouse of rSARS-CoV-2/WT,

600 rSARS-CoV-2/ $\Delta$ 7a-Venus or rSARS-CoV-2/Venus-2A and monitored for 12

601 days for body weight loss **(G)** and survival **(H)**.

602 **Figure 4. Stability of rSARS-CoV-2/Venus-2A.**

603 **(A)** The rSARS-CoV-2/Venus-2A was passaged 7 times in Vero E6 cells and

604 the first (P1), third (P3), fifth (P5) and seventh (P7) passage supernatants were

605 analyzed by plaque assay. Fluorescent plaques were detected under a

606 ChemiDoc MP imaging system (top) and then were immunostained with the

607 1C7C7 N MAb (bottom). The ratio of Venus positive over N positive plaques

608 was calculated (right).

609 **(B)** The lung from one of the mice described in Figure 3 was homogenized and

610 the clarified supernatant was collected and analyzed by plaque assay.

611 Fluorescent plaques were detected using the ChemiDoc MP imaging system

612 (top) and then immunostained with the N protein MAb 1C7C7 N (bottom).

613 Venus-negative plaques were circled in yellow (bottom). The ratio of

614 Venus-positive over N-positive plaques was calculated (right).

615 **Figure 5. Generation and characterization of rSARS-CoV-2 expressing**

616 **Nano luciferase-2A *in vitro*.**

617 (A) Schematic representation of the BAC for generation of  
618 rSARS-CoV-2/Nluc-2A. The Nluc coding sequence is indicated by the light  
619 blue box.

620 (B) Vero E6 cells infected with ~15 PFU of rSARS-CoV-2/WT (left),  
621 rSARS-CoV-2/ $\Delta$ 7a-Nluc (middle) or rSARS-CoV-2/Nluc-2A (right) were fixed,  
622 permeabilized and immunostained with the 1C7C7 N protein MAb.

623 (C) Tissue culture supernatants from Vero E6 cells infected (MOI 0.01) with  
624 rSARS-CoV-2/WT, rSARS-CoV-2/ $\Delta$ 7a-Nluc or rSARS-CoV-2/Nluc-2A, were  
625 collected at the indicated times pi, and tissue culture supernatants were  
626 titrated by plaque assay. LOD, limitation of detection. ns, not significant.

627 (D) Tissue culture supernatants from Vero E6 cells infected (MOI 0.01) with  
628 rSARS-CoV-2/WT, rSARS-CoV-2/ $\Delta$ 7a-Nluc or rSARS-CoV-2/Nluc-2A, were  
629 collected at the indicated times pi and Nluc activity in the tissue culture  
630 supernatants was determined. ns, not significant.

631 **Figure 6. *In vivo* dynamics of SARS-CoV-2 infection by real-time**  
632 **monitoring of Nluc expression.**

633 (A-B) Five-week-old K18 hACE2 transgenic mice were mock-infected or  
634 infected ( $10^5$  PFU/mouse) with rSARS-CoV-2/WT (WT) or  
635 rSARS-CoV-2/Nluc-2A (Nluc-2A). Mice were anesthetized at 1, 2, 4 and 6 dpi  
636 and retro-orbitally injected with the Nluc substrate. Nluc expression was  
637 determined using an IVIS system (A) and quantitatively analyzed by the Aura  
638 program (B).

639 **(C-D)** Lungs were excised and photographed at 1, 2, 4 and 6 dpi **(C)**, and  
640 gross lesions on the lung surfaces were quantitatively analyzed by ImageJ **(D)**.

641 ns, not significant.

642 **(E)** Nluc activity in the nasal turbinate (left), lungs (middle) and brain (right)

643 from infected mice were determined using a multi-plate reader. ns, not

644 significant.

645 **(F)** Viral titers in the nasal turbinate (left), lungs (middle) and brain (right) were

646 determined by plaque assay. ns, not significant.

647 **(G)** Correlation between viral titers and Nluc intensity in the lungs of

648 rSARS-CoV-2/Nluc-2A-infected mice.

649 **(H-I)** Five-week-old K18 hACE2 transgenic mice were mock-infected or

650 infected ( $10^5$  PFU/mouse) with rSARS-CoV-2/WT or rSARS-CoV-2/Nluc-2A

651 and monitored for 12 days for changes in body weight **(H)** and survival **(I)**.

652 **Figure 7. Prophylactic effect of 1212C2 on mice infected with**

653 **rSARS-CoV-2/Nluc-2A.**

654 **(A-B)** Five-week-old K18 hACE2 transgenic mice were injected with isotype

655 IgG control or 1212C2 MAbs and 12 h after treatment, mice were infected ( $10^5$

656 PFU/mouse) with rSARS-CoV-2/Nluc-2A (Nluc-2A). Mock-treated and

657 mock-infected mice were included as controls. Mice were anesthetized at 1, 2,

658 4 and 6 dpi and retro-orbitally injected with the Nluc substrate. Nluc expression

659 was determined using an IVIS system **(A)** and quantitatively analyzed by the

660 Aura program **(B)**.

661 **(C-D)** The lungs were excised and photographed at 1, 2, 4 and 6 dpi **(C)** and  
662 the gross lesions on the lung surfaces were quantitatively analyzed by ImageJ  
663 **(D)**. ns, not significant.

664 **(E)** Nluc activity in the nasal turbinate (left), lungs (middle) and brains (right)  
665 from infected mice were measured using a multi-plate reader.

666 **(F)** Viral titers in the nasal turbinate (left), lungs (middle) and brain (right) were  
667 determined by plaque assay.

668 **(G-H)** Five-week-old K18 hACE2 transgenic mice were injected with isotype  
669 IgG control or 1212C2 MAbs and 12 h after treatment, mice were infected  
670 ( $10^5$  PFU/mouse) with rSARS-CoV-2/Nluc-2A (Nluc-2A). Mock-treated and  
671 mock-infected mice were included as controls. Mice were monitored for 12  
672 days for changes in body weight **(G)** and survival **(H)**.

673

674

675

676

677

678

679

680

681

682

683 **REFERENCES**

- 684 Avila-Perez, G., Park, J.G., Nogales, A., Almazan, F., and Martinez-Sobrido, L.  
685 (2019). Rescue of Recombinant Zika Virus from a Bacterial Artificial  
686 Chromosome cDNA Clone. *J Vis Exp*.
- 687 Cai, Y., Iwasaki, M., Beitzel, B.F., Yú, S., Postnikova, E.N., Cubitt, B., DeWald,  
688 L.E., Radoshitzky, S.R., Bollinger, L., and Jahrling, P.B. (2018). Recombinant  
689 Lassa virus expressing green fluorescent protein as a tool for high-throughput  
690 drug screens and neutralizing antibody assays. *Viruses* 10, 655.
- 691 Chiem, K., Vasquez, D.M., Park, J.-G., Platt, R.N., Anderson, T., Walter, M.R.,  
692 Kobie, J.J., Ye, C., and Martinez-Sobrido, L. (2021). Generation and  
693 Characterization of recombinant SARS-CoV-2 expressing reporter genes. *J*  
694 *Virol*, e02209-02220.
- 695 Chiem, K., Ye, C., and Martinez - Sobrido, L. (2020). Generation of  
696 Recombinant SARS-CoV-2 Using a Bacterial Artificial Chromosome. *Current*  
697 *protocols in microbiology* 59, e126.
- 698 De Wit, E., Van Doremalen, N., Falzarano, D., and Munster, V.J. (2016). SARS  
699 and MERS: recent insights into emerging coronaviruses. *Nature Reviews*  
700 *Microbiology* 14, 523.
- 701 Efron, B. (1988). Logistic-Regression, Survival Analysis, and the Kaplan-Meier  
702 Curve. *J Am Stat Assoc* 83, 414-425.
- 703 Hall, M.P., Unch, J., Binkowski, B.F., Valley, M.P., Butler, B.L., Wood, M.G.,  
704 Otto, P., Zimmerman, K., Vidugiris, G., Machleidt, T., *et al.* (2012). Engineered

705 luciferase reporter from a deep sea shrimp utilizing a novel imidazopyrazinone  
706 substrate. *ACS Chem Biol* 7, 1848-1857.

707 Hiscox, J.A., Cavanagh, D., and Britton, P. (1995). Quantification of individual  
708 subgenomic mRNA species during replication of the coronavirus transmissible  
709 gastroenteritis virus. *Virus Res* 36, 119-130.

710 Hou, Y.J., Okuda, K., Edwards, C.E., Martinez, D.R., Asakura, T., Dinnon III,  
711 K.H., Kato, T., Lee, R.E., Yount, B.L., and Mascenik, T.M. (2020). SARS-CoV-2  
712 reverse genetics reveals a variable infection gradient in the respiratory tract.  
713 *Cell* 182, 429-446. e414.

714 Hu, B., Guo, H., Zhou, P., and Shi, Z.-L. (2020). Characteristics of  
715 SARS-CoV-2 and COVID-19. *Nature Reviews Microbiology*, 1-14.

716 Imai, M., Iwatsuki-Horimoto, K., Hatta, M., Loeber, S., Halfmann, P.J.,  
717 Nakajima, N., Watanabe, T., Ujie, M., Takahashi, K., Ito, M., *et al.* (2020).  
718 Syrian hamsters as a small animal model for SARS-CoV-2 infection and  
719 countermeasure development. *Proc Natl Acad Sci U S A* 117, 16587-16595.

720 Kim, Y.I., Kim, S.G., Kim, S.M., Kim, E.H., Park, S.J., Yu, K.M., Chang, J.H.,  
721 Kim, E.J., Lee, S., Casel, M.A.B., *et al.* (2020). Infection and Rapid  
722 Transmission of SARS-CoV-2 in Ferrets. *Cell Host Microbe* 27, 704-709 e702.

723 Li, J., Gong, X., Wang, Z., Chen, R., Li, T., Zeng, D., and Li, M. (2020). Clinical  
724 features of familial clustering in patients infected with 2019 novel coronavirus  
725 in Wuhan, China. *Virus Res* 286, 198043.

726 Lu, R., Zhao, X., Li, J., Niu, P., Yang, B., Wu, H., Wang, W., Song, H., Huang,

727 B., Zhu, N., *et al.* (2020). Genomic characterisation and epidemiology of 2019  
728 novel coronavirus: implications for virus origins and receptor binding. *Lancet*  
729 *395*, 565-574.

730 Luke, G., Escuin, H., De Felipe, P., and Ryan, M. (2010). 2A to the fore -  
731 research, technology and applications. *Biotechnol Genet Eng Rev* *26*,  
732 223-260.

733 Manicassamy, B., Manicassamy, S., Belicha-Villanueva, A., Pisanelli, G.,  
734 Pulendran, B., and García-Sastre, A. (2010). Analysis of in vivo dynamics of  
735 influenza virus infection in mice using a GFP reporter virus. *Proc Natl Acad Sci*  
736 *U S A* *107*, 11531-11536.

737 Nogales, A., Avila-Perez, G., Rangel-Moreno, J., Chiem, K., DeDiego, M.L.,  
738 and Martinez-Sobrido, L. (2019). A Novel Fluorescent and Bioluminescent  
739 Bireporter Influenza A Virus To Evaluate Viral Infections. *J Virol* *93*.

740 Nogales, A., Baker, S.F., Ortiz-Riano, E., Dewhurst, S., Topham, D.J., and  
741 Martinez-Sobrido, L. (2014). Influenza A virus attenuation by codon  
742 deoptimization of the NS gene for vaccine development. *J Virol* *88*,  
743 10525-10540.

744 Oladunni, F.S., Park, J.-G., Pino, P.A., Gonzalez, O., Akhter, A., Allué-Guardia,  
745 A., Olmo-Fontánez, A., Gautam, S., Garcia-Vilanova, A., and Ye, C. (2020).  
746 Lethality of SARS-CoV-2 infection in K18 human angiotensin-converting  
747 enzyme 2 transgenic mice. *Nature communications* *11*, 1-17.

748 Piepenbrink, M.S., Park, J.-G., Oladunni, F.S., Deshpande, A., Basu, M.,



749 Sarkar, S., Loos, A., Woo, J., Lovalenti, P., and Sloan, D. (2021). Therapeutic  
750 activity of an inhaled potent SARS-CoV-2 neutralizing human monoclonal  
751 antibody in hamsters. *Cell Reports Medicine*, 100218.

752 Rihn, S.J., Merits, A., Bakshi, S., Turnbull, M.L., Wickenhagen, A., Alexander,  
753 A.J.T., Baillie, C., Brennan, B., Brown, F., Brunker, K., *et al.* (2021). A plasmid  
754 DNA-launched SARS-CoV-2 reverse genetics system and coronavirus toolkit  
755 for COVID-19 research. *PLoS Biol* 19, e3001091.

756 Scobey, T., Yount, B.L., Sims, A.C., Donaldson, E.F., Agnihothram, S.S.,  
757 Menachery, V.D., Graham, R.L., Swanstrom, J., Bove, P.F., Kim, J.D., *et al.*  
758 (2013). Reverse genetics with a full-length infectious cDNA of the Middle East  
759 respiratory syndrome coronavirus. *Proc Natl Acad Sci U S A* 110,  
760 16157-16162.

761 Silvas, J., Vasquez, D.M., Park, J.-G., Chiem, K., Torrelles, J., Platt, R.N.,  
762 Anderson, T., Ye, C., and Martínez-Sobrido, L. (2021). Contribution of  
763 SARS-CoV-2 accessory proteins to viral pathogenicity in K18 hACE2  
764 transgenic mice. *bioRxiv*.

765 Sims, A.C., Baric, R.S., Yount, B., Burkett, S.E., Collins, P.L., and Pickles, R.J.  
766 (2005). Severe acute respiratory syndrome coronavirus infection of human  
767 ciliated airway epithelia: role of ciliated cells in viral spread in the conducting  
768 airways of the lungs. *J Virol* 79, 15511-15524.

769 Singh, D.K., Singh, B., Ganatra, S.R., Gazi, M., Cole, J., Thippeshappa, R.,  
770 Alfson, K.J., Clemmons, E., Gonzalez, O., Escobedo, R., *et al.* (2021).

771 Responses to acute infection with SARS-CoV-2 in the lungs of rhesus  
772 macaques, baboons and marmosets. *Nat Microbiol* 6, 73-86.

773 Sun, S.H., Chen, Q., Gu, H.J., Yang, G., Wang, Y.X., Huang, X.Y., Liu, S.S.,  
774 Zhang, N.N., Li, X.F., Xiong, R., *et al.* (2020). A Mouse Model of SARS-CoV-2  
775 Infection and Pathogenesis. *Cell Host Microbe* 28, 124-133 e124.

776 Wu, J.T., Leung, K., and Leung, G.M. (2020). Nowcasting and forecasting the  
777 potential domestic and international spread of the 2019-nCoV outbreak  
778 originating in Wuhan, China: a modelling study. *Lancet* 395, 689-697.

779 Xie, X., Muruato, A., Lokugamage, K.G., Narayanan, K., Zhang, X., Zou, J., Liu,  
780 J., Schindewolf, C., Bopp, N.E., and Aguilar, P.V. (2020a). An infectious cDNA  
781 clone of SARS-CoV-2. *Cell host microbe*  
782 27, 841-848. e843.

783 Xie, X., Muruato, A.E., Zhang, X., Lokugamage, K.G., Fontes-Garfias, C.R.,  
784 Zou, J., Liu, J., Ren, P., Balakrishnan, M., Cihlar, T., *et al.* (2020b). A  
785 nanoluciferase SARS-CoV-2 for rapid neutralization testing and screening of  
786 anti-infective drugs for COVID-19. *Nat Commun* 11, 5214.

787 Xu, Z., Shi, L., Wang, Y., Zhang, J., Huang, L., Zhang, C., Liu, S., Zhao, P., Liu,  
788 H., Zhu, L., *et al.* (2020). Pathological findings of COVID-19 associated with  
789 acute respiratory distress syndrome. *Lancet Respir Med* 8, 420-422.

790 Ye, C., Chiem, K., Park, J.-G., Oladunni, F., Platt, R.N., Anderson, T., Almazan,  
791 F., de la Torre, J.C., and Martinez-Sobrido, L. (2020a). Rescue of SARS-CoV-2  
792 from a single bacterial artificial chromosome. *mBio* 11, e02168-02120.

793 Ye, C., de la Torre, J.C., and Martinez-Sobrido, L. (2020b). Development of  
794 Reverse Genetics for the Prototype New World Mammarenavirus Tacaribe  
795 Virus. *J Virol* *94*.  
796 Zheng, J., Wong, L.R., Li, K., Verma, A.K., Ortiz, M.E., Wohlford-Lenane, C.,  
797 Leidinger, M.R., Knudson, C.M., Meyerholz, D.K., McCray, P.B., Jr., *et al.*  
798 (2021). COVID-19 treatments and pathogenesis including anosmia in  
799 K18-hACE2 mice. *Nature* *589*, 603-607.

800

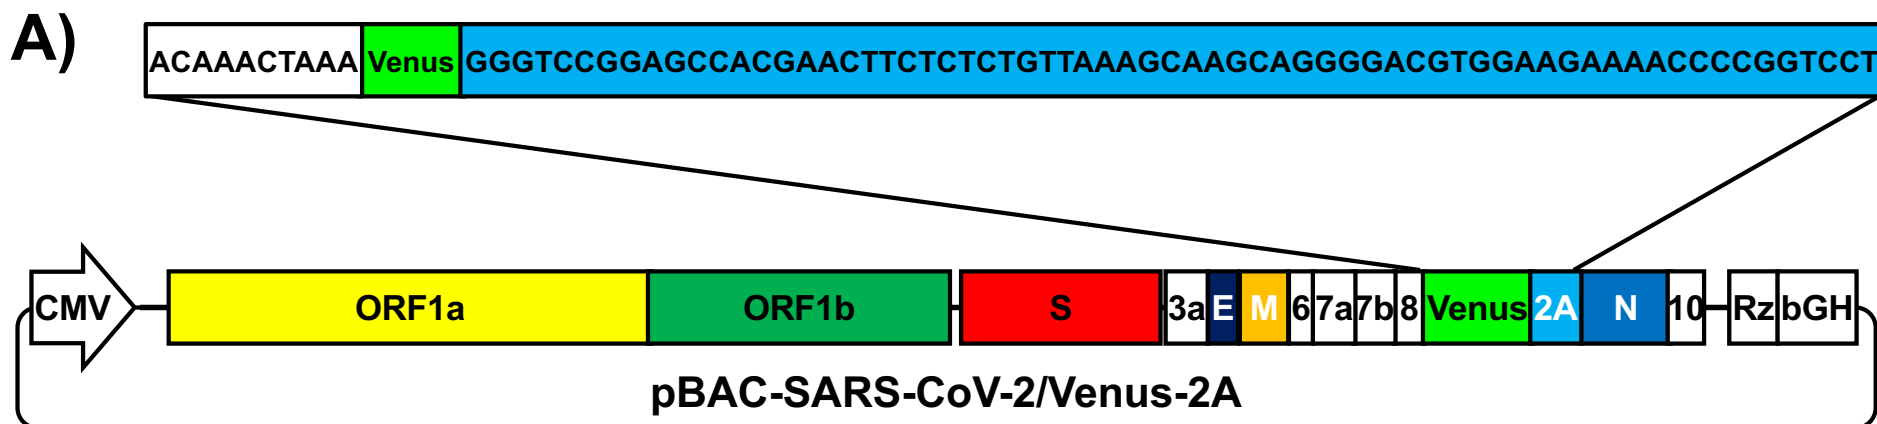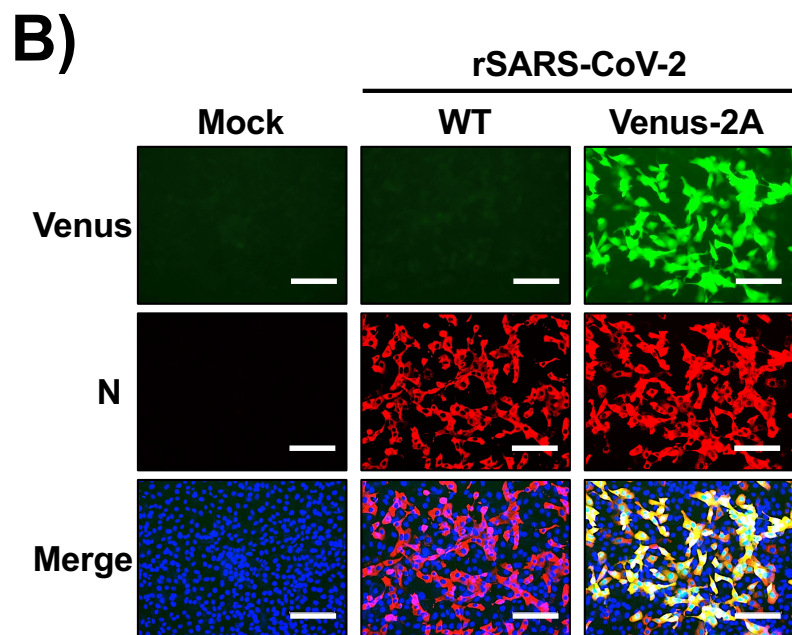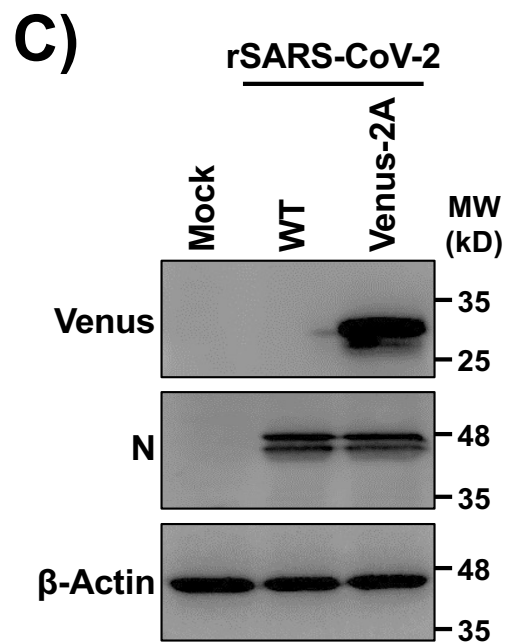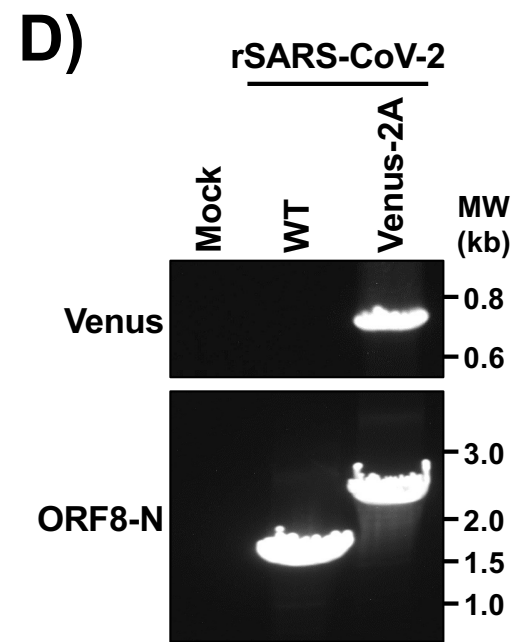

**A)**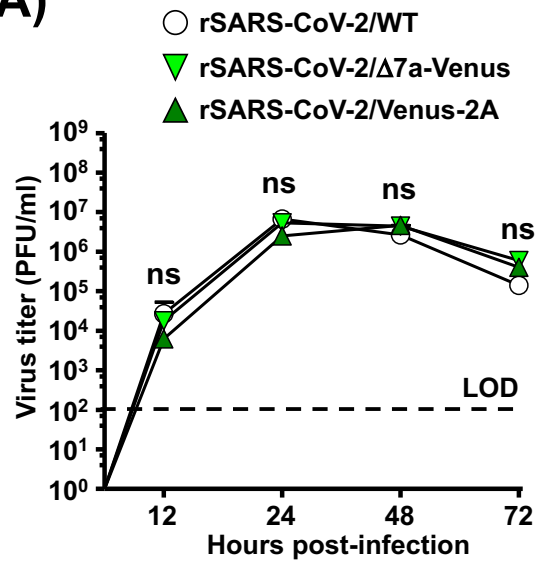**C)**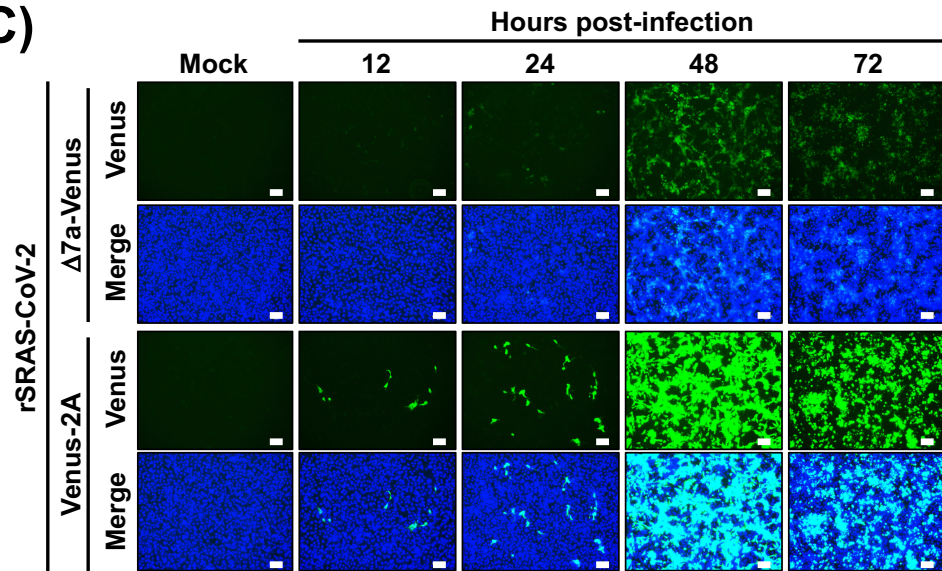**B)**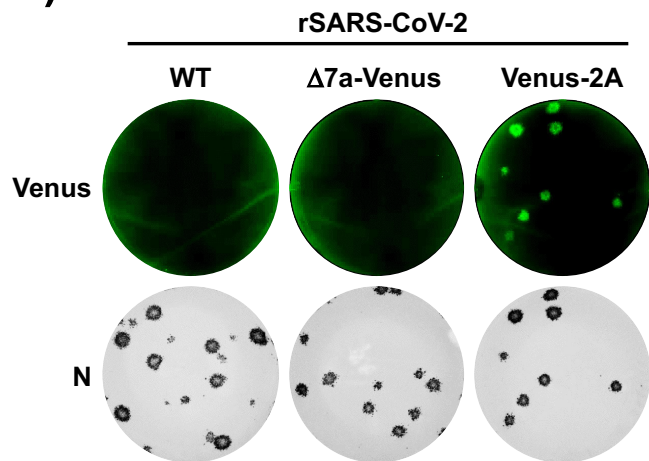**D)**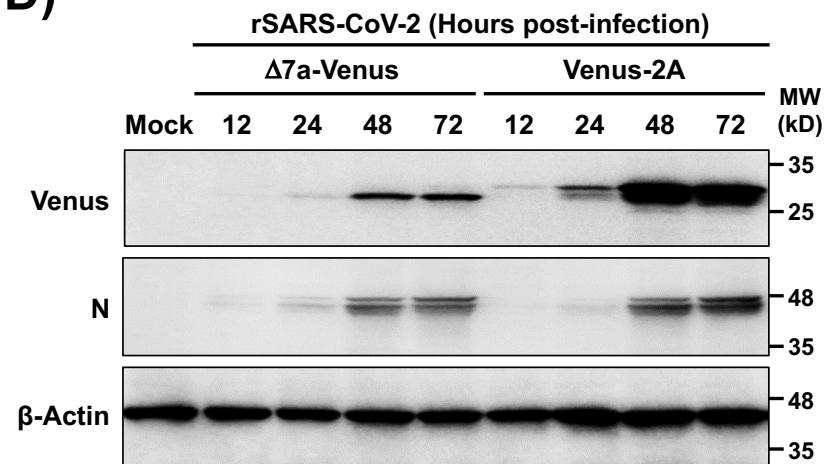

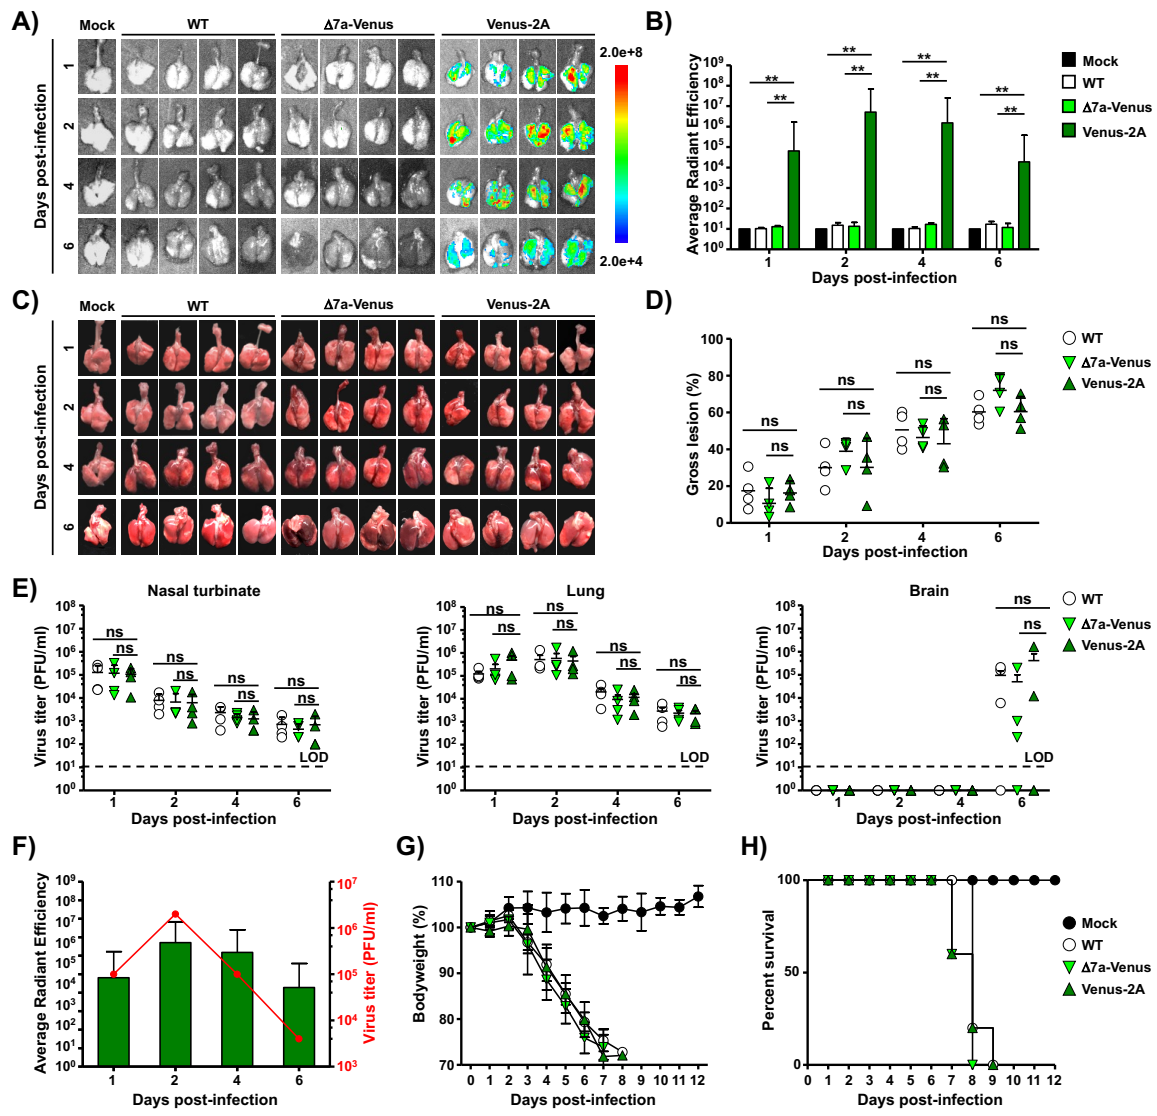



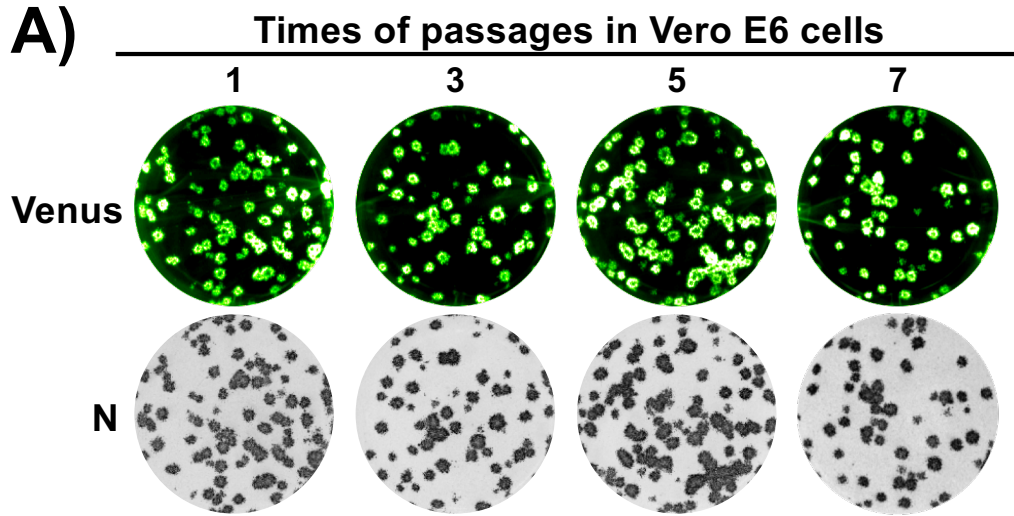

|           | P1   | P3   | P5   | P7   |
|-----------|------|------|------|------|
| Venus+    | 68   | 66   | 71   | 72   |
| N+        | 68   | 66   | 71   | 72   |
| Venus+/N+ | 100% | 100% | 100% | 100% |

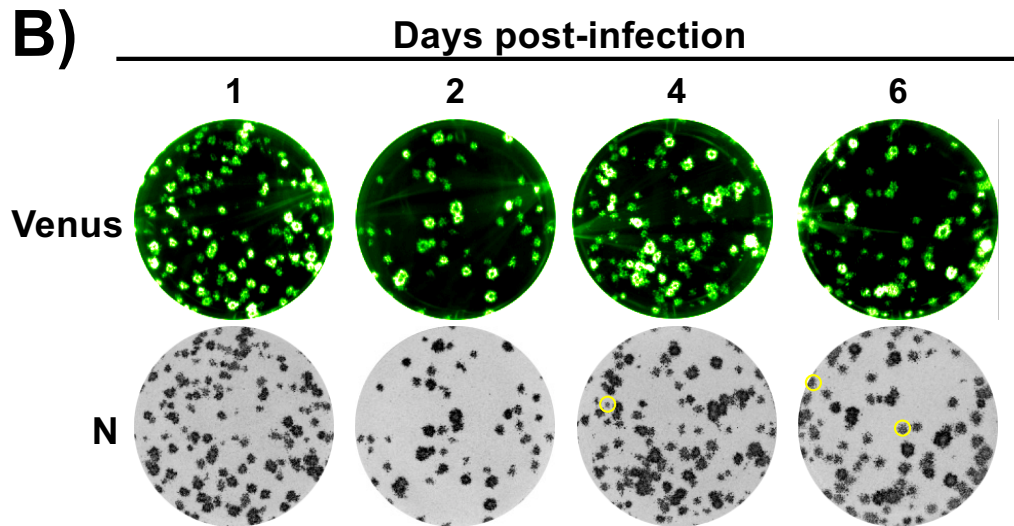

|           | D1   | D2   | D4  | D6  |
|-----------|------|------|-----|-----|
| Venus+    | 78   | 52   | 98  | 108 |
| N+        | 78   | 52   | 99  | 110 |
| Venus+/N+ | 100% | 100% | 99% | 98% |

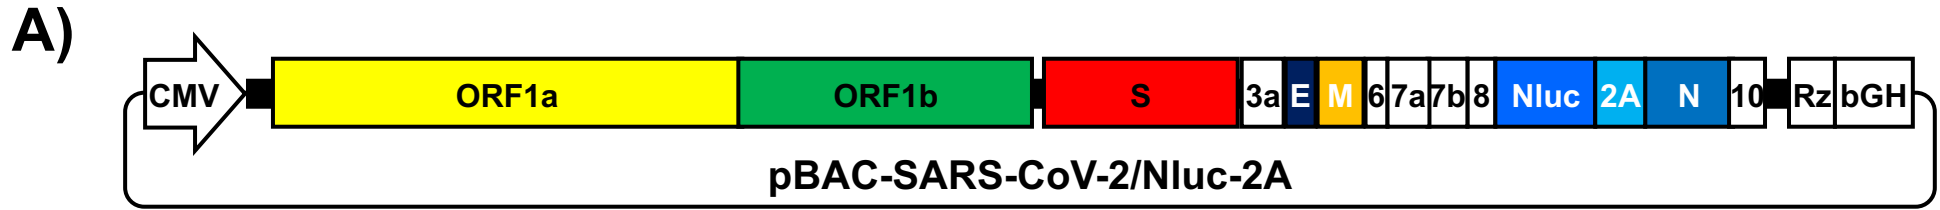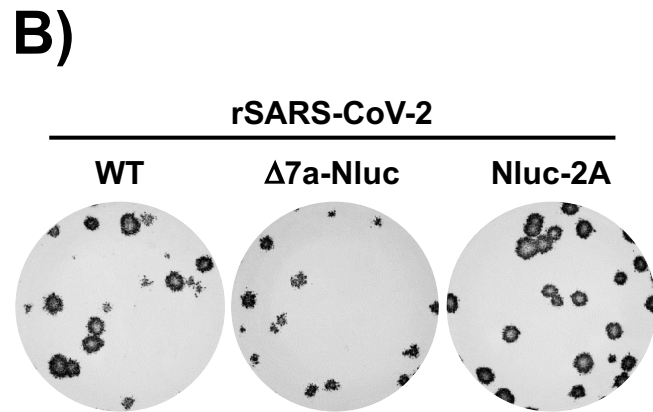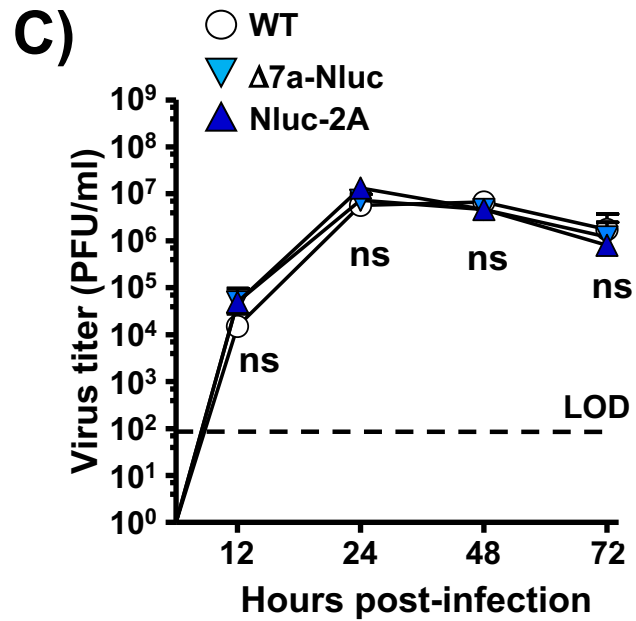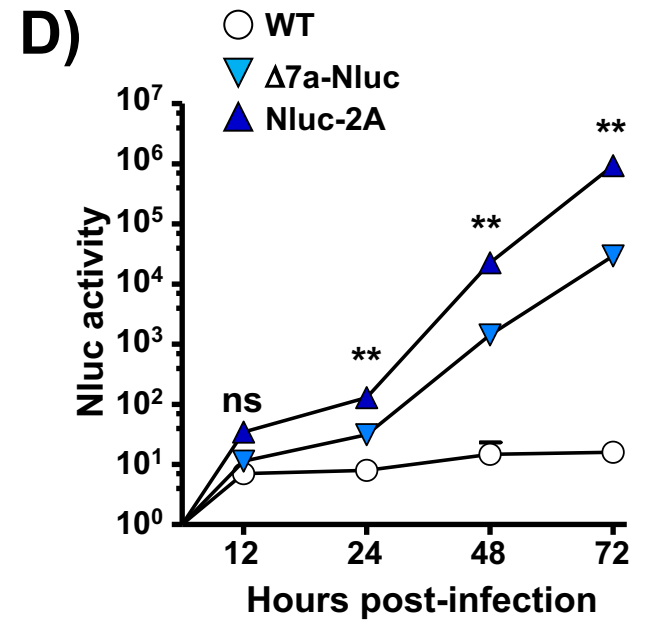



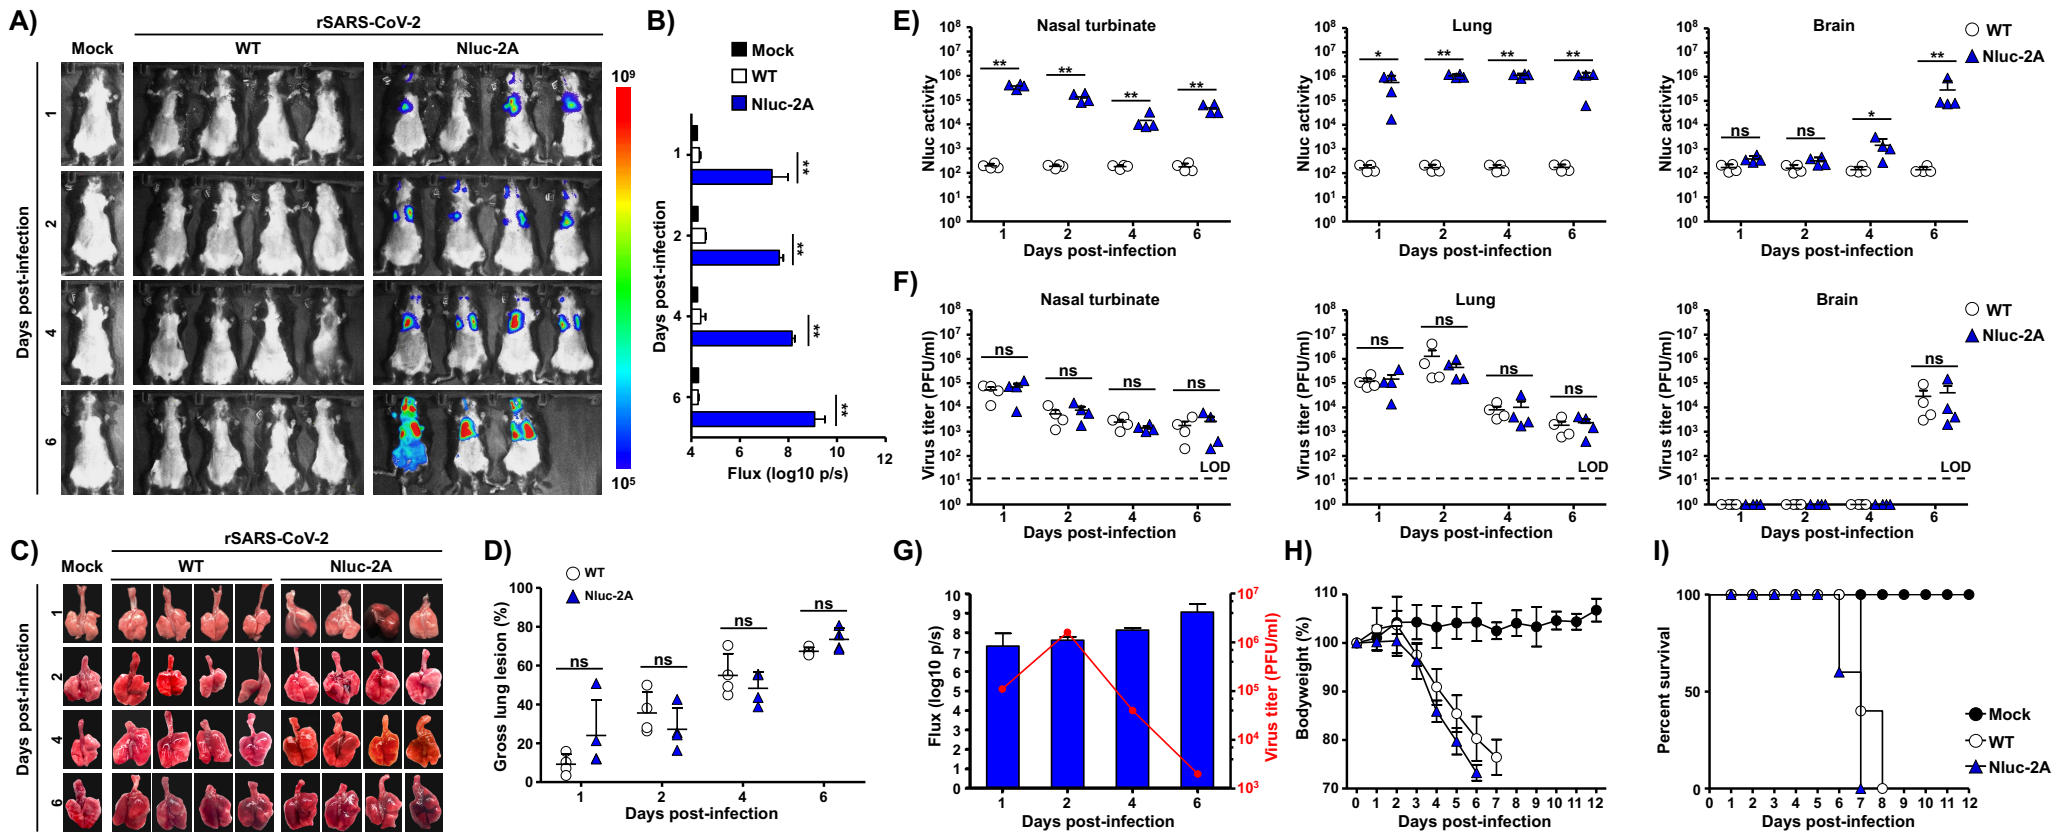

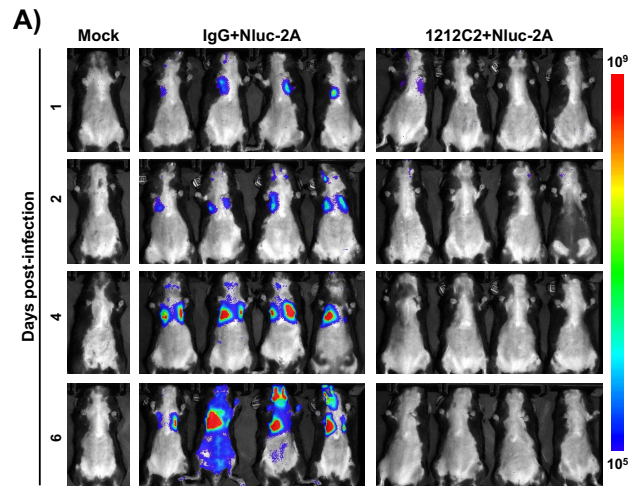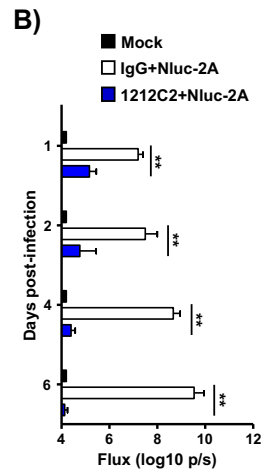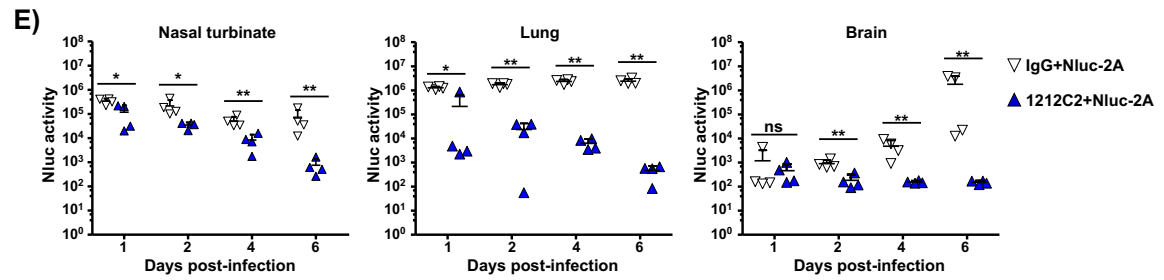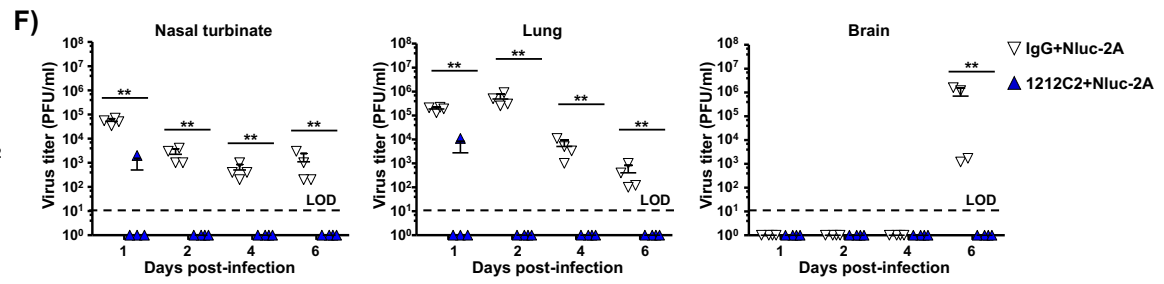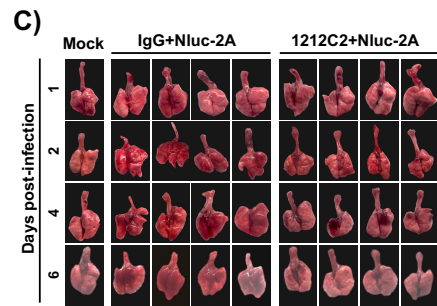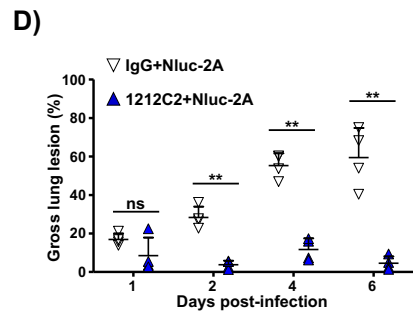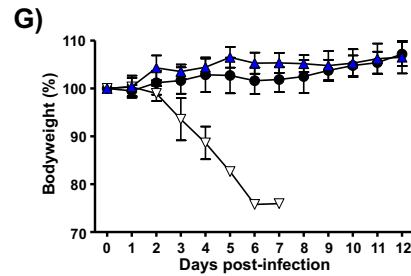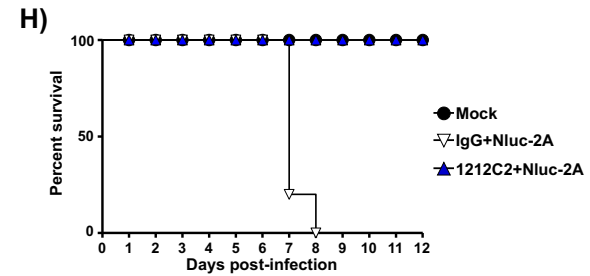

Source: https://www.biorxiv.org/content/biorxiv/early/2021/06/04/2021.06.03.446942.full.pdf
